# Supplementary material
Source: Springer Nature journal article supplement (https://www.springermedizin.de/resource/supplementary/12891_2009_900_MOESM1_ESM.pdf/9506666)

**A**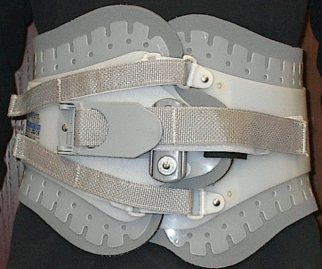**B**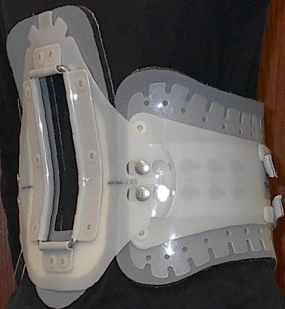**C**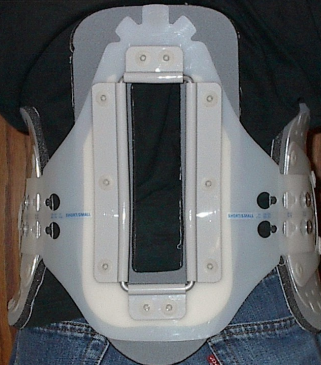

Supplement: MOESM1 [file 9506666]
